# Supplementary material
Source: Springer Nature journal article supplement (https://www.springermedizin.de/resource/supplementary/12995_2012_239_MOESM4_ESM.pdf/9622974)

Length of service groups: ○ 0-7 years (n=20) ● 8-15 years (n=30) ● >15 years (n=10)

Frequency, Hz

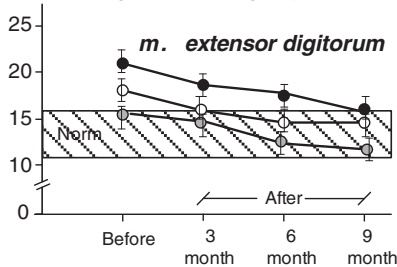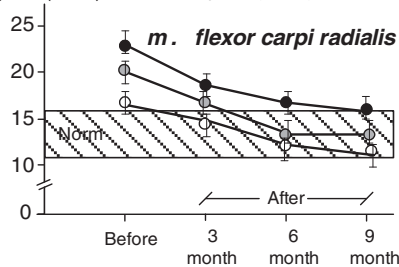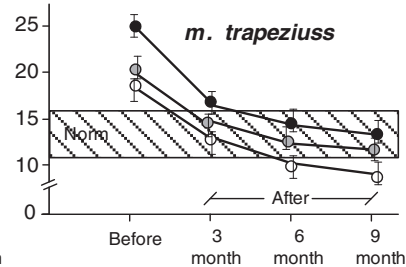

Supplement: MOESM4 [file 9622974]
